# Supplementary material for: A redox-active porous polymer based on poly(imide-triazine) as a high-performance cathode for lithium-ion batteries
Source: Royal Society of Chemistry journal article supplement (doi:10.1039/d4ta00221k), 2024-01-01
Supplement: d4ta00221k1.pdf [file d4ta00221k1.pdf]

Supporting Information:

## Redox-Active Porous Polymer Based on Poly (Imides-Triazine) As High-Performance Cathode for Lithium-ion Batteries

Refka El Oueslati,<sup>a</sup> Badr Jismy,<sup>\*a</sup> Benjamin Flamme,<sup>a</sup> Nicolas Leclerc,<sup>b</sup> Fouad Ghamouss<sup>\*ac</sup> and Mohamed Abarbri<sup>\*a</sup>

### List of contents

**Table S1.** Elemental analysis results of PIT network compared with literature.**SErreur ! Signet non défini.**

**Table S2.** Specific surface area, and pore volume parameters for the PIT**SErreur ! Signet non défini.**

**Table S3.** Summary of the literature on different characterization techniques .....S2

**Table S4.** Performance comparison of our PIT with examples from the literature ..... S2-S4

**Figure S1** Microscopic Characterization of the current collector (Sigracet 25 BC) .....S4

**Figure S2** Electrochemical performance of the current collector (Sigracet 25 BC)**SErreur ! Signet non défini.**

**Figure S3** Electrochemical performance of the super P electrode .....S5

Theoretical capacity  $C_t$  .....S5

**Table S1.** Elemental analysis results of PIT network compared with literature.

| $X_{eq}$ of MA | $X_{eq}$ of PMDA | Solvent                | T (°C) | Time (h) | Chemical formula  | Theoretical values (%)             | Found values (%)                   | Ref       |
|----------------|------------------|------------------------|--------|----------|-------------------|------------------------------------|------------------------------------|-----------|
| 1              | 1                | Without solvent        | 325    | 5        | --                | C : 50.64<br>N : 27.27<br>H : 1.30 | C : 49.61<br>N : 29.66<br>H : 1.54 | 1         |
| 1              | 1                | Without solvent        | 325    | 4        | $C_{13}H_4N_6O_4$ | C : 50.66<br>N : 27.27<br>H : 1.31 | C : 49.52<br>N : 28.70<br>H : 2.20 | 2         |
|                |                  |                        | 1011   | 7 min    | $C_{12}H_2N_4O_4$ | C : 54.1<br>N : 21.1<br>H : 0.8    | C : 47.1<br>N : 26.2<br>H : 2.4    | 3         |
| 1              | 1                | Without solvent        | 325    | 4        | --                | --                                 | C : 45.49<br>N : 26.68<br>H : 2.14 | 4         |
| 1              | 1                | Without solvent        | 325    | 4        | $C_{12}H_2N_4O_4$ | C : 54.1<br>N : 21.1<br>H : 0.8    | C : 47.9<br>N : 27.3<br>H : 2.3    | 5         |
| 1              | 1.5              | Distilled DMSO-Toluene | 180    | 72       | $C_{18}H_3N_6O_6$ | C : 54.15<br>N : 21.05<br>H : 0.76 | C : 42.00<br>N : 40.58<br>H : 5.15 | 6         |
| 1              | 1.5              | DMSO                   | 180    | 12       |                   |                                    |                                    | 7         |
| 1              | 1.5              | Dry DMSO               | 180    | 72       | $C_{18}H_3N_6O_6$ | C : 54.15<br>N : 21.05<br>H : 0.76 | C : 38.42<br>N : 33.76<br>H : 5.42 | This Work |

**Table S2.** Specific surface area, and pore volume parameters for the PIT

| Synthesis procedure | $S_{BET}^a/m^2 g^{-1}$ | $V_{total}^b/cm^3 g^{-1}$ | $V_{micro}^c/cm^3 g^{-1}$ | $V_{meso}^d/cm^3 g^{-1}$ | Ref              |
|---------------------|------------------------|---------------------------|---------------------------|--------------------------|------------------|
| Solvothermal        | 660                    | 0.60                      | 0.21                      | 0.39                     | 6                |
|                     | 430                    | —                         | —                         | —                        | 7                |
|                     | 635.5                  | 0.98                      | 0.04                      | 0.94                     | 8                |
|                     | <b>674.26</b>          | <b>0.543</b>              | <b>0.267</b>              | <b>0.276</b>             | <b>This Work</b> |
| Solid-state thermal | 3.929                  | —                         | —                         | —                        | 1                |
|                     | 1.6                    | —                         | —                         | —                        | 3                |
|                     | 40                     | —                         | —                         | —                        | 9                |
|                     | 7.322                  | —                         | —                         | —                        | 10               |
|                     | 4.39                   | —                         | —                         | —                        | 11               |

<sup>a</sup> Specific surface area calculated by a Brunauer-Emmett-Teller (BET) method.

<sup>b</sup> Total pore volume determined at  $P/P_0=0.99$ .

<sup>c</sup> Micropore volume calculated by a Horvath-Kawazoe (HK) method.

<sup>d</sup> Mesopore volume determined by  $V_{total} - V_{micro}$ .

**Table S3.** Summary of the literature on different characterization techniques

| Synthesis procedure | FT-IR | <sup>13</sup> C NMR | EA | TGA | SEM | EDS mapping | BET | XRD | XPS | Ref       |
|---------------------|-------|---------------------|----|-----|-----|-------------|-----|-----|-----|-----------|
| Solvothermal        | M     | ✓                   | M  | M   | I   | —           | M   | M   | —   | 6         |
|                     | I     | —                   | —  | —   | —   | —           | I   | M   | —   | 7         |
|                     | I     | —                   | —  | M   | I   | —           | I   | —   | —   | 8         |
|                     | —     | —                   | —  | —   | —   | —           | —   | ✓   | —   | 12        |
|                     | M     | —                   | M  | I   | M   | —           | M   | M   | —   | This Work |
| Solid-state thermal | I     | —                   | I  | I   | I   | —           | I   | I   | ✓   | 1         |
|                     | I     | ✓                   | I  | I   | I   | —           | —   | I   | —   | 2         |
|                     | I     | —                   | I  | —   | I   | ✓           | I   | I   | —   | 3         |
|                     | I     | —                   | I  | —   | —   | —           | —   | I   | ✓   | 4         |
|                     | I     | —                   | I  | I   | I   | —           | —   | I   | —   | 5         |
|                     | I     | —                   | —  | M   | —   | —           | I   | I   | —   | 9         |
|                     | I     | —                   | —  | —   | M   | I           | —   | I   | ✓   | 10        |
|                     | I     | —                   | —  | —   | —   | I           | —   | I   | ✓   | 11        |
| I                   | —     | —                   | —  | —   | I   | —           | I   | —   | 13  |           |

(—) = not provided or performed. ✓ = provided or performed. I = provided but inconsistent. M = provided and matches proposed structure.

**Table S4** Performance comparison of our PIT with examples from the literature

| Structure                                                                                         | Exp. Capacity/current                         | Cap. retention/cycles/current                | Ref. |
|---------------------------------------------------------------------------------------------------|-----------------------------------------------|----------------------------------------------|------|
| 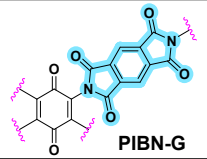<br>PIBN-G     | 193.1/10 C<br>(+ rGO)                         | 86% / 300 / 1 C                              | 14   |
| <br>PI@CNF     | 170/1 C (0.175 A g <sup>-1</sup> )<br>(+ CNF) | 81.3% / 1000 / 1 C (175 mA g <sup>-1</sup> ) | 15   |
| <br>PMTA/SWCNT | 160/0.1 C<br>(+ SWCNT)                        | 80%/1000/0.5 C                               | 16   |
| <br>Azo-CTF    | 205/0.1 A g <sup>-1</sup>                     | 89.1% / 5000 / 4 A g <sup>-1</sup>           | 17   |

|                                                                                                         |                                                |                                           |                  |
|---------------------------------------------------------------------------------------------------------|------------------------------------------------|-------------------------------------------|------------------|
| 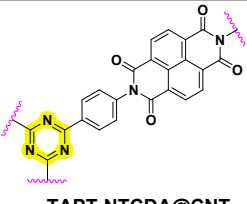 <p>TAPT-NTCDA@CNT</p> | <p>155/0.05 A g<sup>-1</sup><br/>(+ CNT)</p>   | <p>87.3% / 500 / 1 A g<sup>-1</sup></p>   | <p>18</p>        |
|  <p>E-TP-COF</p>       | <p>30/2 A g<sup>-1</sup><br/>(exfoliation)</p> | <p>87.3%/500/0.2 A g<sup>-1</sup></p>     | <p>19</p>        |
|  <p>PIT</p>            | <p>268/25 C (10 A g<sup>-1</sup>)</p>          | <p>65%/4000/15 C (6 A g<sup>-1</sup>)</p> | <p>This Work</p> |

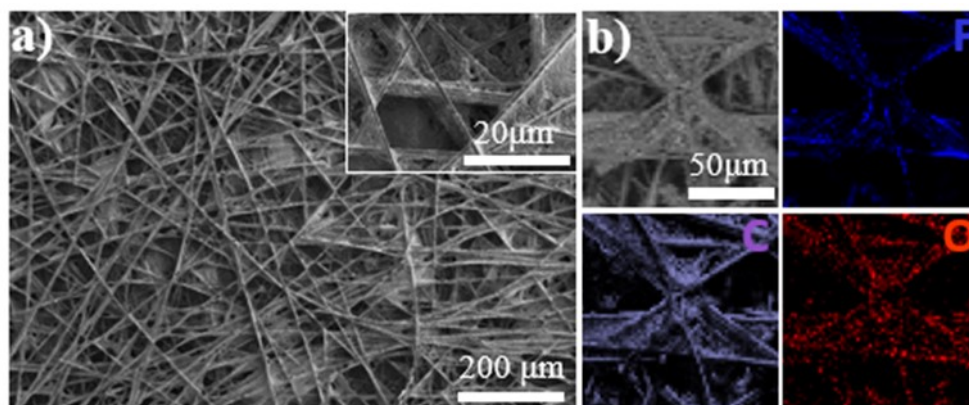

**Fig. S1.** Microscopic Characterization of the current collector (Sigracet 25 BC) (a) SEM images. (b) EDS elemental mapping images of fluorine, carbon, and oxygen.

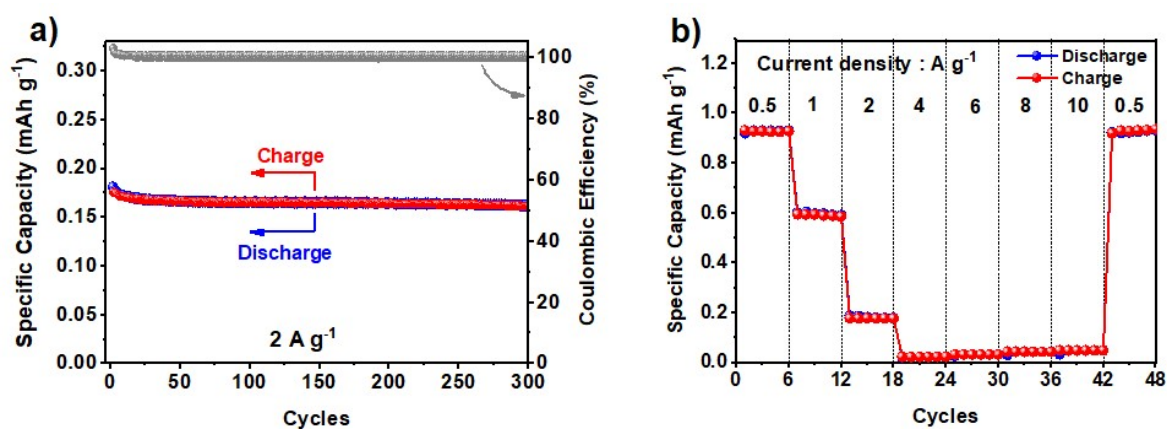

**Fig. S2.** Electrochemical performance of the current collector (carbon paper, Sigracet 25 BC). (a) Long-term cycling performance at a current density of 2 A g<sup>-1</sup>. (b) Rate performance at different current densities.

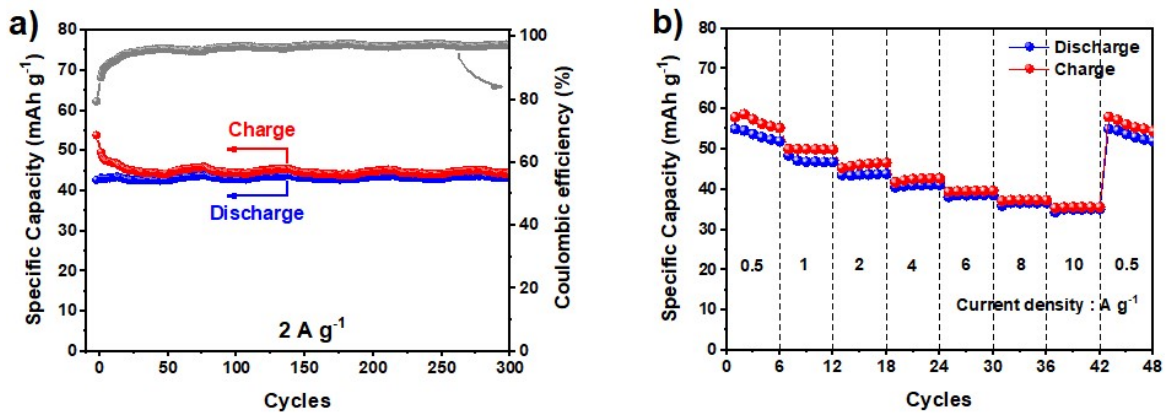

**Fig. S3.** Electrochemical performance of the super P electrode. The electrode was prepared by mixing 90% of conductive carbon (super P) with 10 % of polyvinylidene fluoride binder (PVDF) in N-methyl-2-pyrrolidinone (NMP) and then the mixture was painted on conductive carbon paper (Sigracet 25 BC, Fuel Cells Store, US). The ‘wet’ electrode was further dried for 4h in a 40°C oven after that at 80°C overnight under vacuum. (a) Long-term cycling performance at a current density of 2 A g<sup>-1</sup>. (b) Rate performance at different current densities.

#### Theoretical capacity $C_t$

The theoretical capacity  $C_t$  (mAh g<sup>-1</sup>) of PIT is calculated using the following Eq. (1) :

$$C_t = \frac{F}{3600(M_w/1000)} \quad (1)$$

where  $F$  and  $M_w$  are the Faraday constant (96484 C mol<sup>-1</sup>) and the molecular weight per active specie, respectively.<sup>20</sup>

In each PIT unit cell, 3 imide groups ( $6 \times 1/2 = 3$ ), and 2 triazine rings ( $6 \times 1/3 = 2$ ) are served as active sites. The number of electrons ( $n$ ) implicated in each unit cell of PIT is determined using the equation of  $3 \times 2 + 2 \times 3 = 12$ . The molecular weight of each unit cell could be calculated according to  $M_{\text{unit cell}} = 3 \times M_{\text{diimide}} + 2 \times M_{\text{triazine}} = 3 \times 214 + 2 \times 81 = 804 \text{ g mol}^{-1}$ . Thus the molecular weight per active specie ( $M_w = M_{\text{unit cell}}/12$ ) is 67 g mol<sup>-1</sup> and the theoretical capacity of PIT is found as 400 mA h g<sup>-1</sup>.

## References

- 1 T. Wang, R. Xue, H. Chen, P. Shi, X. Lei, Y. Wei, H. Guo and W. Yang, *New J. Chem.*, 2017, **41**, 14272–14278.
- 2 S. Chu, Y. Wang, Y. Guo, P. Zhou, H. Yu, L. Luo, F. Kong and Z. Zou, *J. Mater. Chem.*, 2012, **22**, 15519.
- 3 L. Lin, P. Ye, C. Cao, Q. Jin, G.-S. Xu, Y.-H. Shen and Y.-P. Yuan, *J. Mater. Chem. A*, 2015, **3**, 10205–10208.
- 4 J. Yang, S. Chu, Y. Guo, L. Luo, F. Kong, Y. Wang and Z. Zou, *Chem. Commun.*, 2012, **48**, 3533.
- 5 J.-Y. Li, X. Jiang, L. Lin, J.-J. Zhou, G.-S. Xu and Y.-P. Yuan, *J. Mol. Catal. Chem.*, 2015, **406**, 46–50.
- 6 Y. Luo, B. Li, L. Liang and B. Tan, *Chem. Commun.*, 2011, **47**, 7704.
- 7 H. Zhu, C. Wang, J. Zhou, M. Wan, Y. Wang, Z. Zou and M. Terrones, *J. Porous Mater.*, 2018, **25**, 1659–1668.
- 8 Y. Wang, Q. Gao, Q. You, G. Liao, H. Xia and D. Wang, *React. Funct. Polym.*, 2016, **103**, 9–16.
- 9 V. A. Kuehl, M. J. Wenzel, B. A. Parkinson, L. de Sousa Oliveira and J. O. Hoberg, *J. Mater. Chem. A*, 2021, **9**, 15301–15309.
- 10 Y. Zhang, M.-S. Zhang, Y. Zhang, X.-W. Chen and J.-H. Wang, *RSC Adv.*, 2016, **6**, 46002–46007.
- 11 P. Meng, J. Huang and X. Liu, *Appl. Surf. Sci.*, 2019, **465**, 125–135.
- 12 J. Zhou, Y. Wang, X. Hao, C. Ma, Y. Wang and Z. Zou, *J. Phys. Chem. C*, 2018, **122**, 1037–1043.
- 13 S. Chu, Y. Wang, C. Wang, J. Yang and Z. Zou, *Int. J. Hydrog. Energy*, 2013, **38**, 10768–10772.
- 14 Z. Luo, L. Liu, J. Ning, K. Lei, Y. Lu, F. Li, J. Chen, *Angew. Chem. Int. Ed.*, 2018, **57**, 9443–9446.
- 15 J. Zhao, T. Kang, Y. Chu, P. Chen, F. Jin, Y. Shen, L. Chen, *Nano Res.*, 2019, **12**, 1355–1360.
- 16 H. Wu, Q. Meng, Q. Yang, M. Zhang, K. Lu, Z. Wei, *Adv. Mater.*, 2015, **27**, 6504–6510.
- 17 C. Wua, M. Hua, X. Yana, G. Shanc, J. Liua, J. Yang, *Energy Stor. Mater.*, 2021, **36**, 347–354.
- 18 K. Li, Y. Wang, B. Gao, X. Lv, Z. Si, H.-G. Wang, *J. Colloid Interface Sci.*, 2021, **601**, 446–453.
- 19 G. Zhao, H. Li, Z. Gao, L. Xu, Z. Mei, S. Cai, T. Liu, X. Yang, H. Guo, X. Sun, *Adv. Funct. Mater.*, 2021, **31**, 2101019.
- 20 G. Zhao, H. Li, Z. Gao, L. Xu, Z. Mei, S. Cai, T. Liu, X. Yang, H. Guo and X. Sun, *Adv. Funct. Mater.*, 2021, **31**, 2101019.
